# Supplementary material for: Cardiovascular Comorbidities Relate More than Others with Disease Activity in Rheumatoid Arthritis
Source: PubMed Central journal article supplement (PMC4710534; doi:10.1371/journal.pone.0146991), 2016-01-12
Supplement: pone.0146991.s001.pdf [file pone.0146991.s001.pdf]

**Table S1. Influence of comorbidities on swollen joint count**

| <b>Comorbidity</b>        | <b>Crude MD (95%CI)</b> | <b>MD (95%CI)<sup>a</sup></b> | <b>MD (95%CI)<sup>b</sup></b> |
|---------------------------|-------------------------|-------------------------------|-------------------------------|
| Hypertension              | -0.29 (-0.54,-0.03)     | -0.27 (-0.56,0.03)            | -0.15 (-0.50,0.21)            |
| Diabetes                  | 0.70 (0.29,1.11)        | 0.74 (0.30,1.18)              | 1.06 (0.55,1.57)              |
| Hyperlipidemia            | -0.7 (-0.97,-0.39)      | -0.71 (-1.0,-0.38)            | -0.77 (-1.17,-0.38)           |
| Renal deficiency          | 0.16 (-0.66,0.98)       | 0.26 (-0.64,1.16)             | -0.19 (-1.23,0.86)            |
| Ischemic heart disease    | -0.27 (-0.87,0.33)      | 0.13 (-0.50,0.77)             | 0.39 (-0.39,1.16)             |
| Stroke                    | -0.62 (-1.54,0.31)      | -0.26 (-1.29,0.77)            | -0.21 (-1.46,1.05)            |
| Cancer disease            | -0.45 (-1.01,0.12)      | -0.56 (-1.18,0.06)            | -0.19 (-0.94,0.55)            |
| Gastro-intestinal ulcers  | -0.16 (-0.56,0.24)      | -0.34 (-0.76,0.07)            | -0.36 (-0.82,0.10)            |
| Hepatitis                 | 0.33 (-0.29,0.95)       | 0.54 (-0.12,1.20)             | 0.50 (-0.22,1.21)             |
| Depression                | -0.20 (-0.66,0.26)      | -0.48 (-0.97,0.00)            | -0.41 (-0.94,0.11)            |
| Chronic pulmonary disease | 0.07 (-0.36,0.49)       | -0.08 (-0.54,0.39)            | -0.01 (-0.55,0.53)            |
| Obesity                   | 0.06 (-0.26,0.39)       | -0.05 (-0.39,0.29)            | 0.10 (-0.28,0.48)             |

MD: mean difference; CI: confidence interval

<sup>a</sup> adjusted for age, gender, treatments (corticosteroids, NSAIDs, DMARDs), disease duration and serology

<sup>b</sup> adjusted for age, gender, treatments (corticosteroids, NSAIDs, DMARDs), disease duration, serology and other comorbidities
