# Supplementary material for: Cardiovascular Comorbidities Relate More than Others with Disease Activity in Rheumatoid Arthritis
Source: PubMed Central journal article supplement (PMC4710534; doi:10.1371/journal.pone.0146991), 2016-01-12
Supplement: pone.0146991.s003.pdf [file pone.0146991.s003.pdf]

**Table S3. Influence of comorbidities on erythrocyte sedimentation rate**

| Comorbidity               | Crude MD (95%CI)   | MD (95%CI) <sup>a</sup> | MD (95%CI) <sup>b</sup> |
|---------------------------|--------------------|-------------------------|-------------------------|
| Hypertension              | 2.76 (1.26,4.27)   | 1.94 (0.18,3.69)        | 1.40 (-0.70,3.51)       |
| Diabetes                  | 5.10 (2.70,7.50)   | 4.21 (1.63,6.79)        | 1.75 (-1.29,4.80)       |
| Hyperlipidemia            | -1.30 (-3.02,0.42) | -2.28 (-4.21,-0.36)     | -3.56 (-5.90,-1.23)     |
| Renal deficiency          | 9.48 (4.65,14.31)  | 7.52 (2.21,12.83)       | 4.71 (-1.49,10.90)      |
| Ischemic heart disease    | 4.50 (1.0,8.0)     | 4.75 (1.03,8.47)        | 5.64 (1.06,10.22)       |
| Stroke                    | 1.60 (-3.84,7.03)  | 3.37 (-2.71,9.45)       | 3.85 (-3.62,11.32)      |
| Cancer disease            | -1.69 (-5.06,1.67) | -2.66 (-6.32,1.0)       | -0.74 (-5.15,3.68)      |
| Gastro-intestinal ulcers  | 2.96 (0.63,5.29)   | 1.86 (-0.56,4.29)       | 0.92 (-1.78,3.63)       |
| Hepatitis                 | 1.51 (-2.09,5.11)  | 1.0 (-2.87,4.9)         | 0.41 (-3.79,4.60)       |
| Depression                | -0.94 (-3.66,1.79) | -3.15 (-6.03,-0.28)     | -3.20 (-6.38,-0.02)     |
| Chronic pulmonary disease | -0.53 (-3.03,1.97) | -1.45 (-4.18,1.28)      | -1.27 (-4.48,1.93)      |
| Obesity                   | 4.70 (2.82,6.58)   | 5.36 (3.39,7.33)        | 5.20 (2.93,7.47)        |

MD: mean difference; CI: confidence interval

<sup>a</sup> adjusted for age, gender, treatments (corticosteroids, NSAIDs, DMARDs), disease duration and serology

<sup>b</sup> adjusted for age, gender, treatments (corticosteroids, NSAIDs, DMARDs), disease duration, serology and other comorbidities
