# Supplementary material for: Cardiovascular Comorbidities Relate More than Others with Disease Activity in Rheumatoid Arthritis
Source: PubMed Central journal article supplement (PMC4710534; doi:10.1371/journal.pone.0146991), 2016-01-12
Supplement: pone.0146991.s004.pdf [file pone.0146991.s004.pdf]

**Table S4. Influence of comorbidities on physician's global assessment of disease activity**

| Comorbidity               | Crude MD (95%CI)    | MD (95%CI) <sup>a</sup> | MD (95%CI) <sup>b</sup> |
|---------------------------|---------------------|-------------------------|-------------------------|
| Hypertension              | 0.10 (-0.05,0.25)   | 0.14 (-0.02,0.31)       | 0.10 (-0.10,0.29)       |
| Diabetes                  | 0.61 (0.37,0.85)    | 0.60 (0.36,0.84)        | 0.53 (0.25,0.81)        |
| Hyperlipidemia            | -0.27 (-0.44,-0.10) | -0.14 (-0.32,0.04)      | -0.31 (-0.52,-0.09)     |
| Renal deficiency          | 0.64 (0.17,1.12)    | 0.83 (0.33,1.32)        | 0.61 (0.03,1.19)        |
| Ischemic heart disease    | 0.18 (-0.17,0.53)   | 0.39 (0.04,0.74)        | 0.42 (-0.01,0.84)       |
| Stroke                    | -0.20 (-0.76,0.36)  | -0.23 (-0.80,0.34)      | -0.20 (-0.89,0.49)      |
| Cancer disease            | -0.16 (-0.49,0.17)  | -0.08 (-0.43,0.26)      | 0.13 (-0.28,0.54)       |
| Gastro-intestinal ulcers  | 0.12 (-0.11,0.35)   | -0.06 (-0.29,0.17)      | -0.14 (-0.39,0.12)      |
| Hepatitis                 | 0.12 (-0.23,0.47)   | 0.05 (-0.32,0.41)       | -0.09 (-0.48,0.30)      |
| Depression                | 0.17 (-0.09,0.43)   | 0.06 (-0.21,0.32)       | 0.02 (-0.28,0.31)       |
| Chronic pulmonary disease | 0.09 (-0.15,0.34)   | 0.09 (-0.17,0.34)       | 0.09 (-0.21,0.38)       |
| Obesity                   | 0.27 (0.09,0.45)    | 0.26 (0.07,0.45)        | 0.20 (-0.01,0.41)       |

MD: mean difference; CI: confidence interval

<sup>a</sup> adjusted for age, gender, treatments (corticosteroids, NSAIDs, DMARDs), disease duration and serology

<sup>b</sup> adjusted for age, gender, treatments (corticosteroids, NSAIDs, DMARDs), disease duration, serology and other comorbidities
