# Supplementary material for: Cardiovascular Comorbidities Relate More than Others with Disease Activity in Rheumatoid Arthritis
Source: PubMed Central journal article supplement (PMC4710534; doi:10.1371/journal.pone.0146991), 2016-01-12
Supplement: pone.0146991.s005.pdf [file pone.0146991.s005.pdf]

**Table S5. Influence of comorbidities on patient's global assessment of disease activity**

| Comorbidity               | Crude MD (95%CI)    | MD (95%CI) <sup>a</sup> | MD (95%CI) <sup>b</sup> |
|---------------------------|---------------------|-------------------------|-------------------------|
| Hypertension              | 0.30 (0.13,0.46)    | 0.33 (0.14,0.52)        | 0.25 (0.02,0.47)        |
| Diabetes                  | 0.53 (0.27,0.80)    | 0.66 (0.38,0.94)        | 0.54 (0.21,0.86)        |
| Hyperlipidemia            | -0.27 (-0.46,-0.08) | -0.12 (-0.33,0.09)      | -0.35 (-0.60,-0.09)     |
| Renal deficiency          | 0.54 (0.01,1.07)    | 0.50 (-0.08,1.07)       | 0.13 (-0.54,0.79)       |
| Ischemic heart disease    | 0.42 (0.03,0.81)    | 0.55 (0.14,0.96)        | 0.48 (-0.02,0.98)       |
| Stroke                    | 0.12 (-0.49,0.72)   | -0.17 (-0.84,0.50)      | -0.42 (-1.23,0.39)      |
| Cancer disease            | 0.14 (-0.23,0.51)   | 0.19 (-0.21,0.59)       | 0.55 (0.08,1.03)        |
| Gastro-intestinal ulcers  | 0.54 (0.28,0.80)    | 0.28 (0.02,0.55)        | 0.20 (-0.09,0.49)       |
| Hepatitis                 | 0.35 (-0.05,0.74)   | 0.24 (-0.18,0.66)       | 0.16 (-0.30,0.62)       |
| Depression                | 0.44 (0.15,0.74)    | 0.33 (0.02,0.64)        | 0.20 (-0.14,0.54)       |
| Chronic pulmonary disease | 0.41 (0.14,0.68)    | 0.46 (0.16,0.75)        | 0.47 (0.13,0.82)        |
| Obesity                   | 0.31 (0.11,0.52)    | 0.33 (0.12,0.55)        | 0.17 (-0.08,0.41)       |

MD: mean difference; CI: confidence interval

<sup>a</sup> adjusted for age, gender, treatments (corticosteroids, NSAIDs, DMARDs), disease duration and serology

<sup>b</sup> adjusted for age, gender, treatments (corticosteroids, NSAIDs, DMARDs), disease duration, serology and other comorbidities
