# Supplementary material for: Cardiovascular Comorbidities Relate More than Others with Disease Activity in Rheumatoid Arthritis
Source: PubMed Central journal article supplement (PMC4710534; doi:10.1371/journal.pone.0146991), 2016-01-12
Supplement: pone.0146991.s006.pdf [file pone.0146991.s006.pdf]

**Table S6. Influence of comorbidities on fatigue**

| <b>Comorbidity</b>        | <b>Crude MD (95%CI)</b> | <b>MD (95%CI)<sup>a</sup></b> | <b>MD (95%CI)<sup>b</sup></b> |
|---------------------------|-------------------------|-------------------------------|-------------------------------|
| Hypertension              | 0.21 (0.03,0.39)        | 0.39 (0.18,0.60)              | 0.19 (-0.06,0.44)             |
| Diabetes                  | 0.62 (0.33,0.91)        | 0.78 (0.47,1.09)              | 0.61 (0.25,0.96)              |
| Hyperlipidemia            | -0.11 (-0.32,0.10)      | 0.22 (-0.02,0.45)             | -0.01 (-0.29,0.26)            |
| Renal deficiency          | 0.83 (0.26,1.41)        | 0.92 (0.29,1.55)              | 0.17 (-0.54,0.89)             |
| Ischemic heart disease    | 0.62 (0.20,1.04)        | 0.74 (0.29,1.19)              | 0.59 (0.05,1.13)              |
| Stroke                    | 1.25 (0.59,1.91)        | 1.22 (0.48,1.96)              | 0.66 (-0.21,1.54)             |
| Cancer disease            | 0.01 (-0.39,0.41)       | 0.05 (-0.39,0.49)             | 0.45 (-0.06,0.97)             |
| Gastro-intestinal ulcers  | 0.72 (0.44,1.0)         | 0.53 (0.23,0.82)              | 0.41 (0.09,0.73)              |
| Hepatitis                 | 0.35 (-0.09,0.78)       | 0.34 (-0.13,0.80)             | 0.16 (-0.33,0.66)             |
| Depression                | 0.73 (0.41,1.05)        | 0.73 (0.39,1.07)              | 0.47 (0.10,0.83)              |
| Chronic pulmonary disease | 0.52 (0.22,0.81)        | 0.50 (0.18,0.83)              | 0.39 (0.02,0.77)              |
| Obesity                   | 0.45 (0.22,0.67)        | 0.52 (0.28,0.75)              | 0.33 (0.07,0.60)              |

MD: mean difference; CI: confidence interval

<sup>a</sup> adjusted for age, gender, treatments (corticosteroids, NSAIDs, DMARDs), disease duration and serology

<sup>b</sup> adjusted for age, gender, treatments (corticosteroids, NSAIDs, DMARDs), disease duration, serology and other comorbidities
