# Supplementary material for: Cardiovascular Comorbidities Relate More than Others with Disease Activity in Rheumatoid Arthritis
Source: PLOS journal article supplement (doi:10.1371/journal.pone.0146991), 2016-01-12
Supplement: S2 (10.1371/journal.pone.0146991.s002) [file journal.pone.0146991.s002]

**Table S2. Influence of comorbidities on tender joint count**

| <b>Comorbidity</b>        | <b>Crude MD (95%CI)</b> | <b>MD (95%CI)<sup>a</sup></b> | <b>MD (95%CI)<sup>b</sup></b> |
|---------------------------|-------------------------|-------------------------------|-------------------------------|
| Hypertension              | -0.08 (-0.43,0.27)      | 0.03 (-0.38,0.43)             | -0.11 (-0.60,0.37)            |
| Diabetes                  | 1.10 (0.55,1.65)        | 1.12 (0.52,1.72)              | 0.93 (0.23,1.63)              |
| Hyperlipidemia            | -0.38 (-0.78,0.02)      | -0.34 (-0.79,0.11)            | -0.56 (-1.10,-0.02)           |
| Renal deficiency          | 1.01 (-0.10,2.12)       | 1.61 (0.39,2.84)              | 0.90 (-0.53,2.32)             |
| Ischemic heart disease    | 0.30 (-0.51,1.12)       | 0.96 (0.10,1.82)              | 1.27 (0.21,2.34)              |
| Stroke                    | -0.21 (-1.47,1.05)      | -0.07 (-1.48,1.35)            | 0.12 (-1.61,1.84)             |
| Cancer disease            | -0.62 (-1.39,0.15)      | -0.72 (-1.57,0.12)            | -0.33 (-1.34,0.69)            |
| Gastro-intestinal ulcers  | 0.33 (-0.21,0.87)       | -0.01 (-0.58,0.56)            | -0.25 (-0.88,0.38)            |
| Hepatitis                 | 0.52 (-0.32,1.37)       | 0.73 (-0.18,1.64)             | 0.31 (-0.67,1.29)             |
| Depression                | 0.36 (-0.26,0.98)       | 0.03 (-0.63,0.69)             | -0.04 (-0.76,0.69)            |
| Chronic pulmonary disease | 0.57 (0.00,1.14)        | 0.34 (-0.29,0.97)             | 0.17 (-0.57,0.90)             |
| Obesity                   | 1.08 (0.64,1.52)        | 0.92 (0.46,1.38)              | 1.07 (0.54,1.59)              |

MD: mean difference; CI: confidence interval

<sup>a</sup> adjusted for age, gender, treatments (corticosteroids, NSAIDs, DMARDs), disease duration and serology

<sup>b</sup> adjusted for age, gender, treatments (corticosteroids, NSAIDs, DMARDs), disease duration, serology and other comorbidities
